# Supplementary material
Source: PubMed Central journal article supplement (PMC6971488)
Supplement: DB190061SupplementaryData.pdf [file DB190061SupplementaryData.pdf]

SUPPLEMENTARY DATA

**Supplementary Figure 1. T<sub>reg</sub> proliferation is much higher compared to CD4<sup>+</sup>Foxp3<sup>-</sup> and CD8<sup>+</sup> T cells following aCD3 treatment.** (A) Representative histograms showing Ki67 staining in the peripheral blood at d22 following the start of aCD3 treatment. Mean Fluorescent Intensity (MFI) is indicated in each histogram for gated CD4<sup>+</sup>Foxp3<sup>+</sup> T<sub>reg</sub> cells, and CD4<sup>+</sup>Foxp3<sup>-</sup> and CD8<sup>+</sup> T cells.

**Day 22 Post- $\alpha$ CD3**

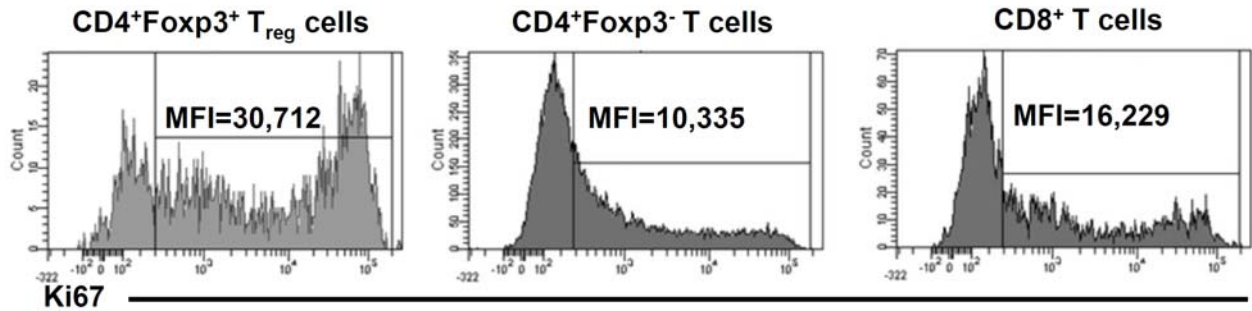

SUPPLEMENTARY DATA

**Supplementary Figure 2. T<sub>reg</sub> depletion and rebound in the pancreatic lymph nodes and spleen after  $\alpha$ CD3 and CyP immunomodulation.** (A) Experimental Scheme. Number of CD8<sup>+</sup> and CD4<sup>+</sup>Foxp3<sup>-</sup> T-cells (per 1x10<sup>6</sup> lymphocytes) in (B) lymph nodes and (C) spleen. Number of CD4<sup>+</sup>Foxp3<sup>+</sup> cells (per 1x10<sup>6</sup> lymphocytes) and percentage of Foxp3<sup>+</sup> CD4 T-cells in (D) lymph nodes and (E) spleen in the presence or absence of CyP of young, prediabetic NOD mice (aged 5-6 weeks). n=3-6 mice/group. \*P<0.0001, +P<0.001, @P<0.01, and ^P<0.05 One-way ANOVA followed by Dunnett's Multiple Comparison Test compared to day 0. Unpaired T-Test,  $\alpha$ CD3 compared to  $\alpha$ CD3<sup>+</sup>CYP at each time point. n=3-6 mice/group. In (D) grey-arrow indicates an early decrease in the number of CD4<sup>+</sup>Foxp3<sup>+</sup> cells after the start of  $\alpha$ CD3 LNs. In (E) white-arrow indicates a late decrease in the number of CD4<sup>+</sup>Foxp3<sup>+</sup> cells after the start of  $\alpha$ CD3.

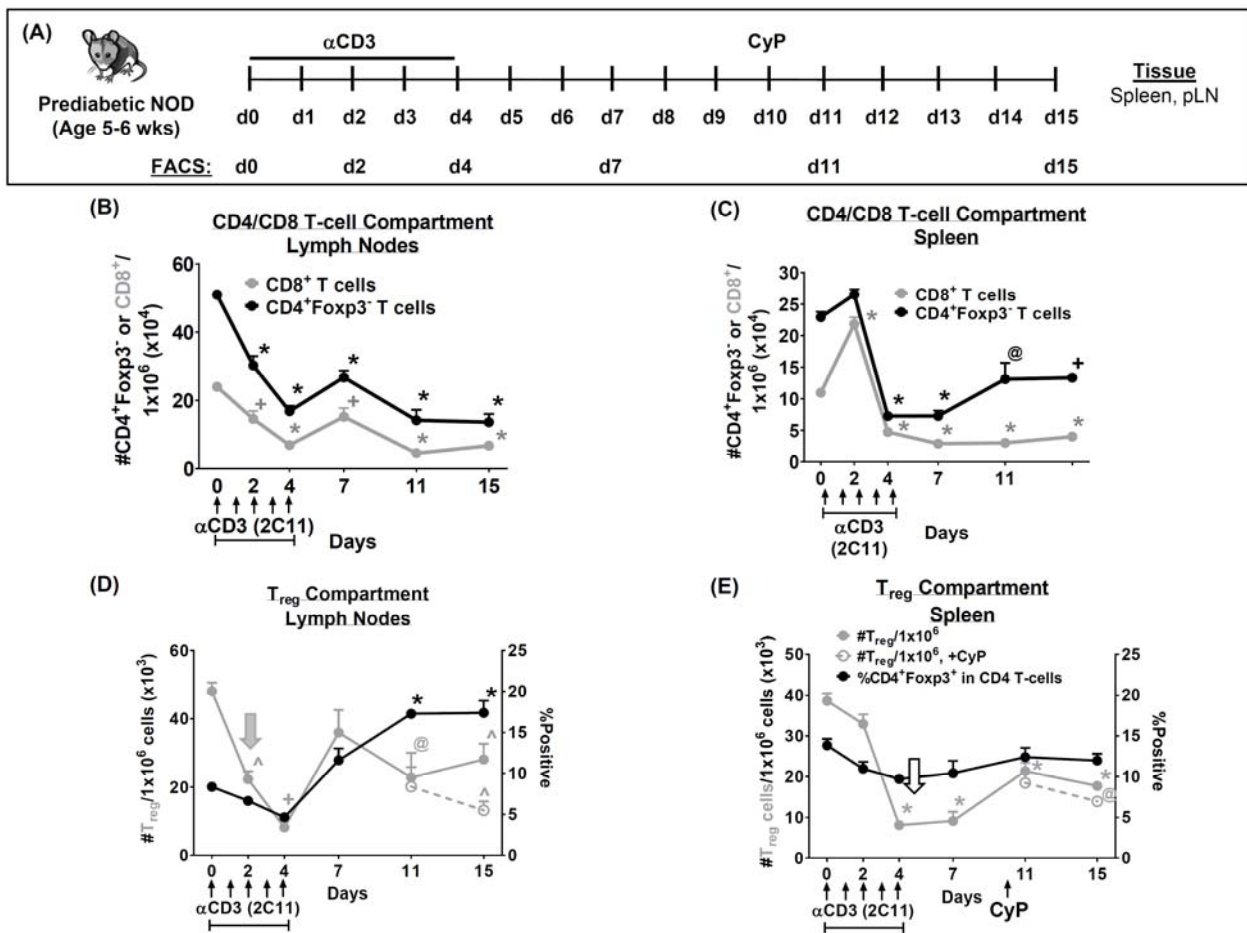

SUPPLEMENTARY DATA

**Supplementary Figure 3. T<sub>reg</sub> depletion and rebound in the Peyer's Patches, Laminaia Propria and Intraepithelial of the small intestine after  $\alpha$ CD3 and CyP immunomodulation.** (A) Experimental Scheme. Number of CD8<sup>+</sup> and CD4<sup>+</sup>Foxp3<sup>-</sup> T-cells (per 1x10<sup>6</sup> lymphocytes) in (B) Peyer's Patches, (C) LPL, and (D) IEL. Number of CD4<sup>+</sup>Foxp3<sup>+</sup> cells (per 1x10<sup>6</sup> lymphocytes) and percentage of Foxp3<sup>+</sup> CD4 T-cells in (E) Peyer's Patches, (F) LPL, and (G) IEL in the presence or absence of CyP of young, prediabetic NOD mice (aged 5-6 weeks). n=3-6 mice/group. \*P<0.0001, +P<0.001, @P<0.01, and ^P<0.05 One-way ANOVA followed by Dunnett's Multiple Comparison Test compared to day 0. Unpaired T Test,  $\alpha$ CD3 compared to  $\alpha$ CD3+CYP at each time point. n=3-6 mice/group.

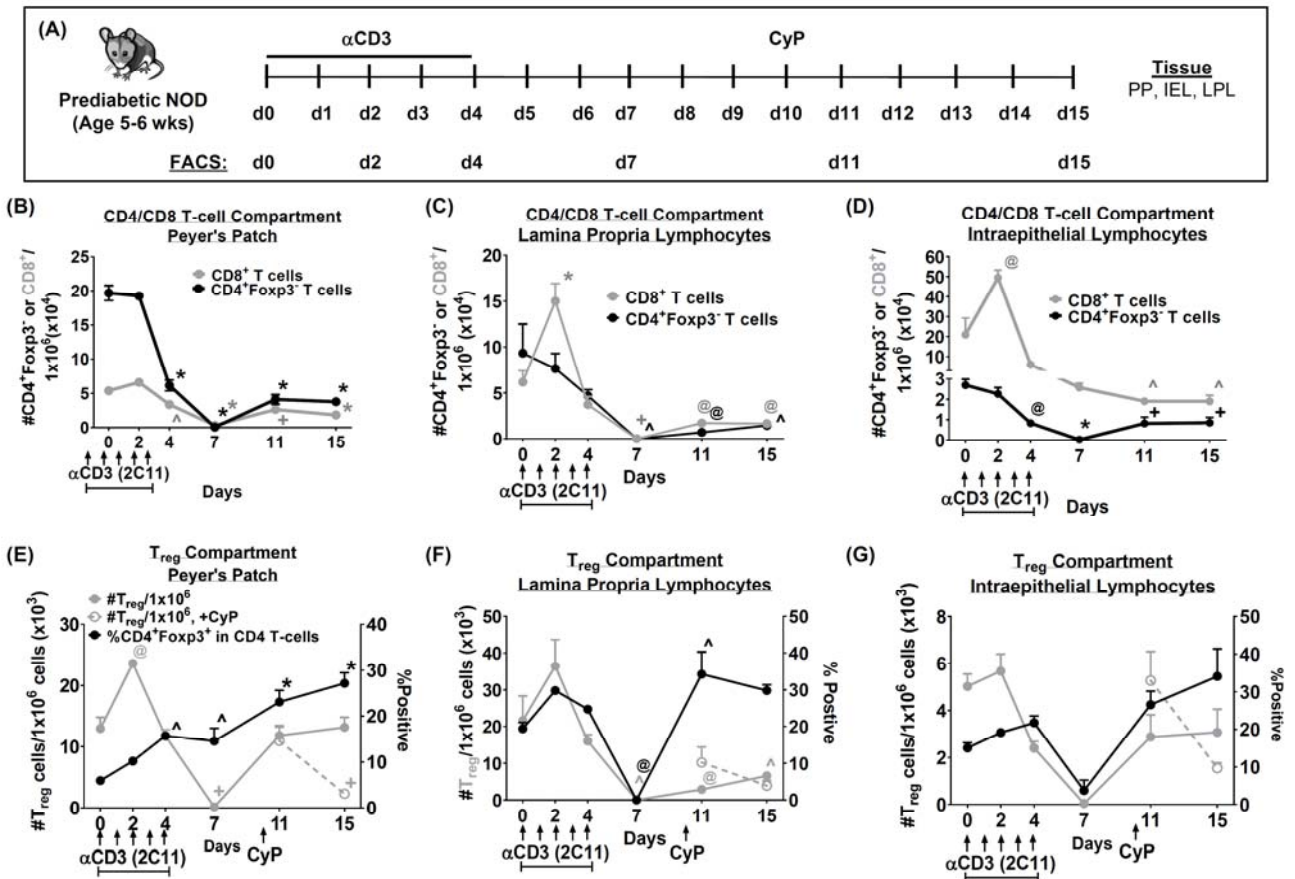

SUPPLEMENTARY DATA

**Supplementary Figure 4. Link between the T<sub>reg</sub> rebound and proliferation in some tissues but not all.** Number of versus the percentage of Ki67<sup>+</sup> in gated CD4<sup>+</sup>Foxp3<sup>+</sup> T cells in the (A) pLN or (B) LNs of young, prediabetic NOD mice (aged 5-6 weeks) receiving 5-day course of  $\alpha$ CD3.

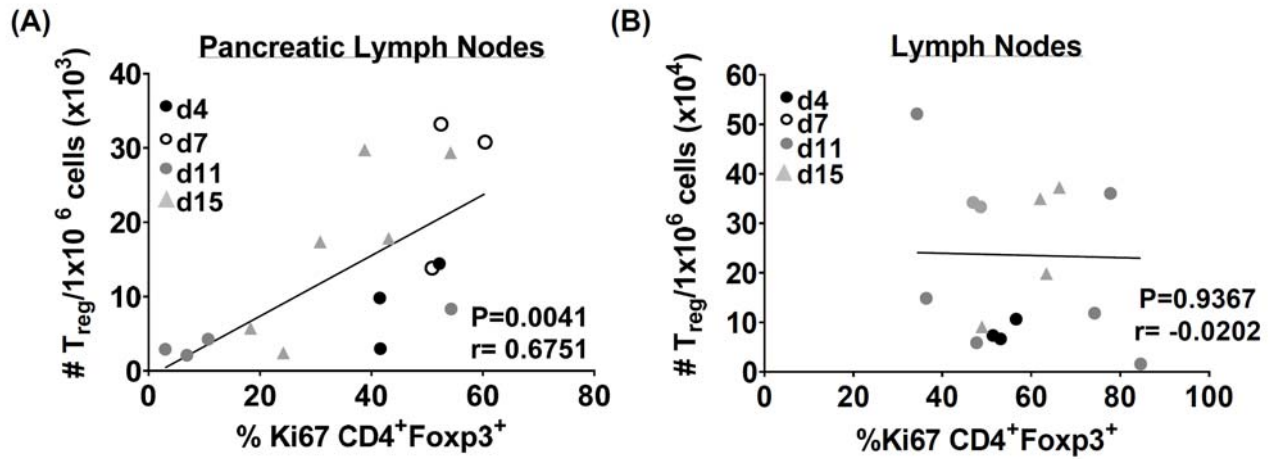

SUPPLEMENTARY DATA

**Supplementary Figure 5. Depletion of T-cells with short-course  $\alpha$ CD3 treatment in late-prediabetic NOD mice leads  $IFN\gamma$ -and  $TNF\alpha$ -producing lymphocytes.** Prediabetic NOD mice treated with 5-day course of intact  $\alpha$ CD3 (50 $\mu$ g) were sacrificed 15 days after the start of treatment and compared to untreated, age- and sex-matched NOD mice. Histograms show the percentage of (A)  $IFN\gamma$  or (B)  $TNF\alpha$  producing  $CD45^+$  cells isolated from pancreatic islets (Pan), spleen (SP), or peripheral blood after culturing cells directly ex-vivo for 4 hours in the presence of brefeldin A. n=3 mice/group.

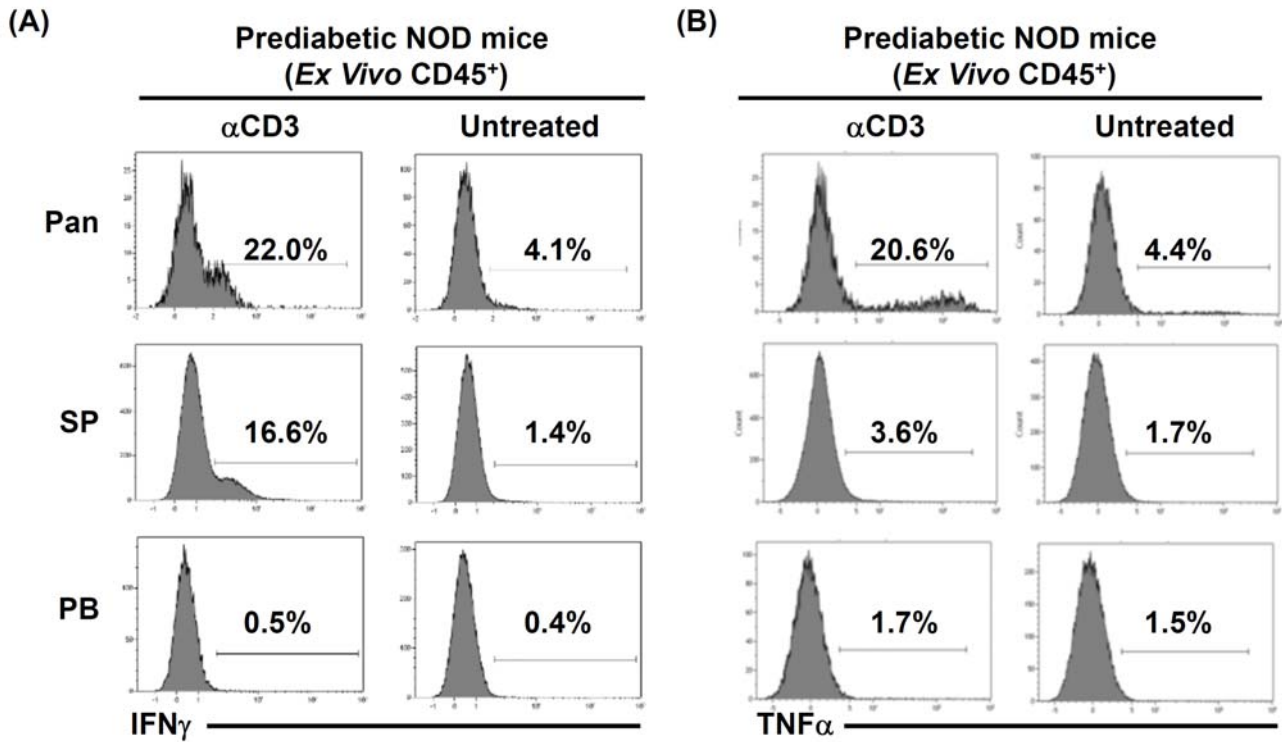

SUPPLEMENTARY DATA

**Supplementary Figure 6. Representative staining of Foxp3 and CD25 expression on donor (Thy1.1+) or host (Thy1.2+) T<sub>regs</sub> from the gated CD4<sup>+</sup>Foxp3<sup>+</sup> population from the blood and SP, LN, pLN, and pancreas 4-weeks post-T<sub>reg</sub> infusion in (A) young, prediabetic NOD mice or (B) recent onset NOD mice treated with various immunomodulation followed by adoptive transfer of congenic, polyclonal Thy1.1+ T<sub>regs</sub>.**

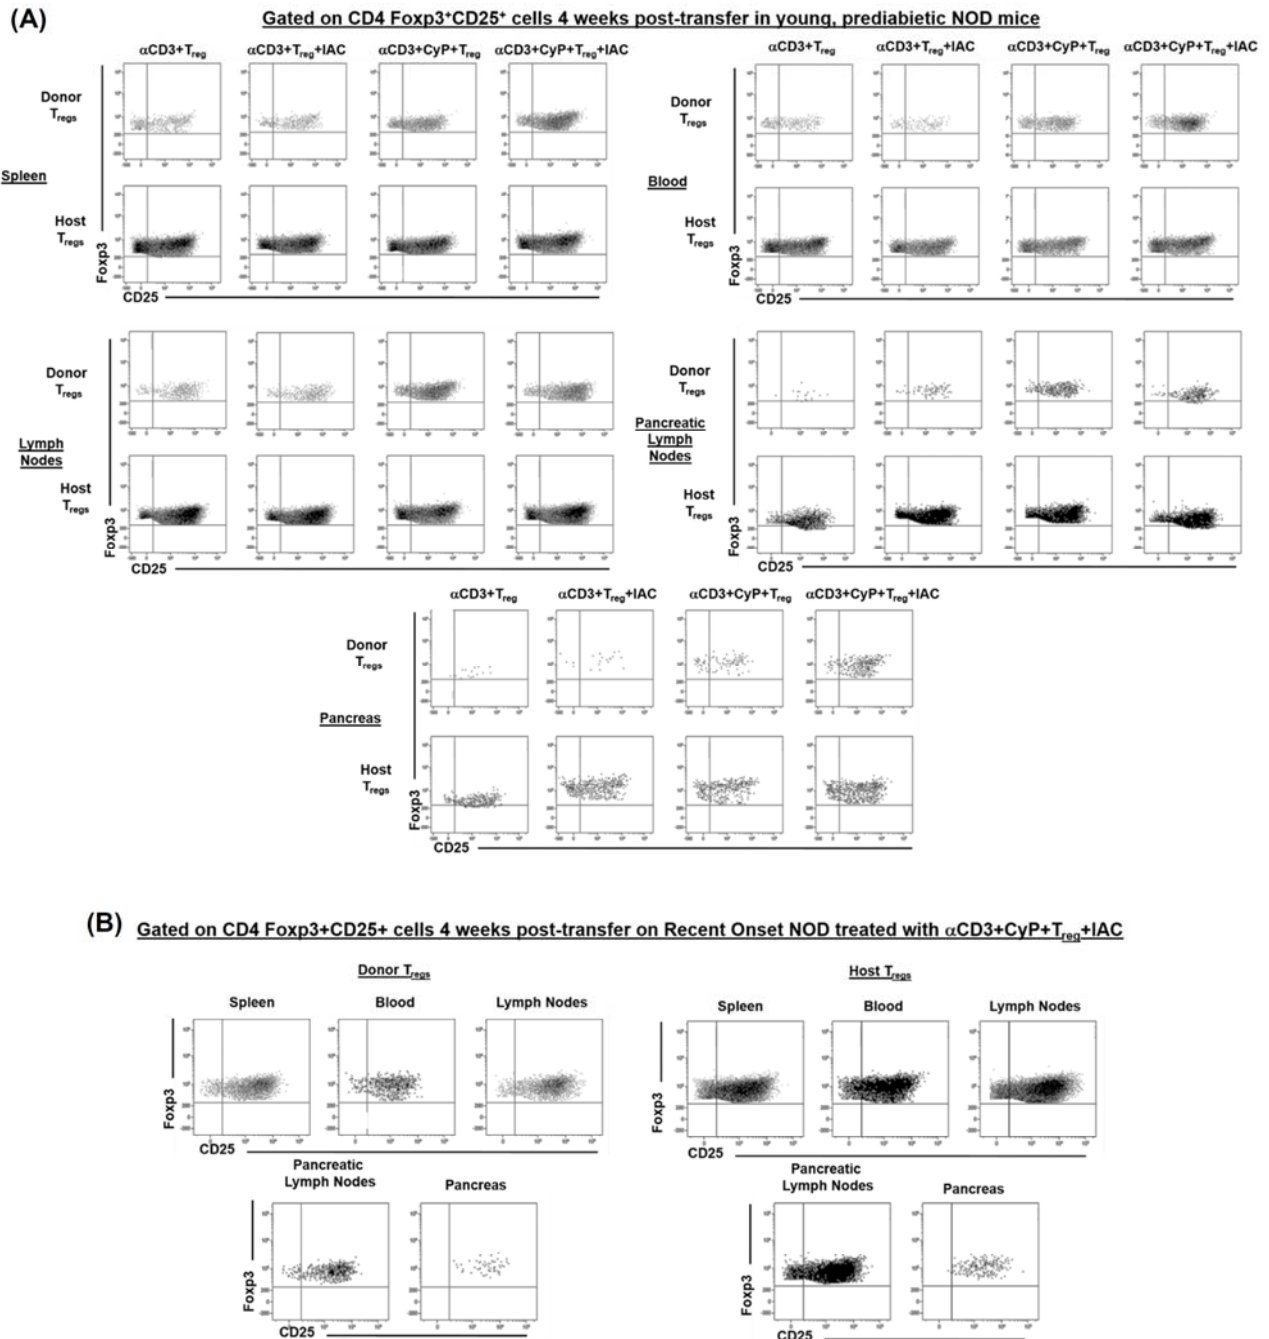

SUPPLEMENTARY DATA

Supplementary Figure 7. (A) Percentage of Thy1.1<sup>+</sup> donor T<sub>reg</sub> engraftment among the total CD4<sup>+</sup>Foxp3<sup>+</sup> T-cells in peripheral blood, (B) Number of donor T<sub>reg</sub>/1x10<sup>6</sup> lymphocytes in peripheral blood, and (C) Percentage of CD4<sup>+</sup>Foxp3<sup>+</sup> cells in the gated CD4 T cells in peripheral blood of late, prediabetic NOD mice. Percentage of Thy1.1<sup>+</sup> donor T<sub>reg</sub> engraftment among the total CD4<sup>+</sup>Foxp3<sup>+</sup> T-cells 4wk post-T<sub>reg</sub> infusion in the SP, LN, pancreatic (p)LN, and pancreas (Pan) of (D) young, prediabetic NOD (E) late, female prediabetic NOD mice aged 16-22 weeks of age in mice treated with αCD3+T<sub>reg</sub>, αCD3+T<sub>reg</sub>+IAC, αCD3+CyP+T<sub>reg</sub>, or αCD3+CyP+T<sub>reg</sub>+IAC. IAC=anti-IL-2 (JES6)+rmIL-2 complex. (F) Percentage of Thy1.1<sup>+</sup> donor T<sub>reg</sub> engraftment among the total CD4<sup>+</sup>Foxp3<sup>+</sup> T-cells 4wk post-T<sub>reg</sub> infusion in the SP, LN, pancreatic (p)LN, and pancreas (Pan) of recent onset NOD mice treated with αCD3+CyP+T<sub>reg</sub>+IAC. n=3-4 mouse/treatment group

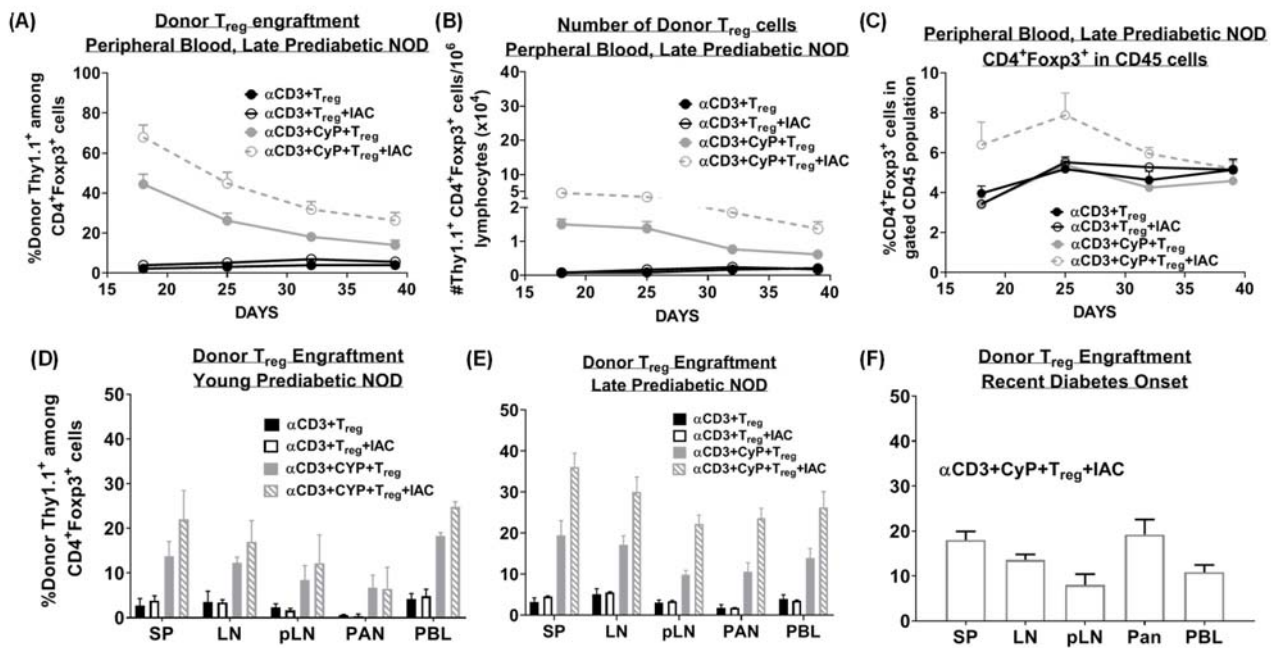

SUPPLEMENTARY DATA

**Supplementary Table 1. Engraftment of Donor T<sub>regs</sub> following  $\alpha$ CD3+CyP Immunomodulation.** Young, prediabetic female NOD mice were treated with combinational regimen of  $\alpha$ CD3+T<sub>reg</sub>,  $\alpha$ CD3+T<sub>reg</sub>+IAC,  $\alpha$ CD3+CyP+T<sub>reg</sub>,  $\alpha$ CD3+CyP+T<sub>reg</sub>+IAC, as described in Figure3A. Shown is number of donor T<sub>reg</sub>/1x10<sup>6</sup> lymphocytes in the peripheral blood d15, 18, 22, 25, 32, and 39 after the start of  $\alpha$ CD3 treatment.

|            | $\alpha$ CD3 +<br>T <sub>reg</sub> | $\alpha$ CD3 +<br>T <sub>reg</sub> + IAC | $\alpha$ CD3 +<br>CyP + T <sub>reg</sub> | $\alpha$ CD3 + CyP +<br>T <sub>reg</sub> + IAC |
|------------|------------------------------------|------------------------------------------|------------------------------------------|------------------------------------------------|
| <b>d15</b> | 2,242 ±<br>554                     | 9,719 ±<br>4,421                         | 23,999 ±<br>11,691                       | 29,300 ±<br>12,512                             |
| <b>d18</b> | 2,251 ±<br>468                     | 15,108 ±<br>4,339                        | 97,400 ±<br>6,249                        | 256,480 ±<br>44,905                            |
| <b>d22</b> | 4,003 ±<br>2,179                   | 9,262 ±<br>1,964                         | 20,724 ±<br>1,716                        | 122,812 ±<br>12,262                            |
| <b>d25</b> | 1,159 ±<br>169                     | 2,164 ±<br>431                           | 14,166 ±<br>1,062                        | 58,178 ±<br>18,306                             |
| <b>d32</b> | 1,683 ±<br>391                     | 1,954 ±<br>330                           | 12,325 ±<br>107                          | 25,210 ±<br>3,612                              |
| <b>d39</b> | 1,221 ±<br>244                     | 1,431 ±<br>235                           | 6,559 ±<br>167                           | 10,754 ±<br>541                                |



SUPPLEMENTARY DATA

**Supplementary Table 2. Engraftment of Donor T<sub>regs</sub> following  $\alpha$ CD3+CyP Immunomodulation.** Recent onset diabetic female NOD mice were treated with combinational regimen of  $\alpha$ CD3+CyP+T<sub>reg</sub>+IAC as described in Figure3A. Shown is number of donor T<sub>reg</sub>/1x10<sup>6</sup> lymphocytes in the peripheral blood, spleen, LN, pLN, and pancreas d22 and 39 after the start of  $\alpha$ CD3 treatment.

|            | <b>PBL</b>                    | <b>SP</b>               | <b>LN</b>               | <b>pLN</b>              | <b>PAN</b>              |
|------------|-------------------------------|-------------------------|-------------------------|-------------------------|-------------------------|
| <b>d22</b> | <b>22,207<br/>±<br/>5,536</b> | <b>NA</b>               | <b>NA</b>               | <b>NA</b>               | <b>NA</b>               |
| <b>d39</b> | <b>5,277±<br/>507</b>         | <b>6,934±<br/>2,172</b> | <b>6,582±<br/>1,940</b> | <b>2,943±<br/>1,235</b> | <b>4,500±<br/>2,801</b> |
